# Supplementary material for: A Small Gtp-Binding Protein GhROP3 Interacts with GhGGB Protein and Negatively Regulates Drought Tolerance in Cotton (Gossypium hirsutum L.)
Source: MDPI journal article supplement (doi:10.3390/plants11121580), 2022-06-15
Supplement: s1 [file s1]

**Table S1. Primer and application.**

| Primer        | Sequence (5'-3')                      | Application         |
|---------------|---------------------------------------|---------------------|
| CM-GhROP3-F   | <u>TCTAGAG</u> GGATCCCAGAGCTAAGACATTA | Vector construction |
| CM-GhROP3-R   | <u>CCCCGGT</u> TGCAAGGCTTTCTCTTTGG    |                     |
| Y2H-GhROP3-F  | <u>CCCCGG</u> ATGAGCACTGCAAGATTTATC   |                     |
| Y2H-GhROP3-R  | <u>CTGCAGT</u> CAAAGGAAAGCACATGTTCT   |                     |
| Y2H-GhGGB-F   | <u>GAATTC</u> ATGGCGACGAGAGAGTGGAAC   |                     |
| Y2H-GhGGB-R   | <u>GGATCCC</u> CTAAATTATACCTATGGCAGT  |                     |
| BiFC-GhROP3-F | <u>CTCGAG</u> ATGAGCACTGCAAGATTTATC   |                     |
| BiFC-GhROP3-R | <u>GCGGCCG</u> CTCAAAGGAAAGCACATGTTCT |                     |
| BiFC-GhGGB-F  | <u>CTCGAG</u> ATGGCGACGAGAGAGTGGAAC   |                     |
| BiFC-GhGGB-R  | <u>GCGGCCG</u> CCAATTATACCTATGGCAGT   |                     |
| q-GhROP3-F    | GAGCAACACCAATATCAACATCT               | qRT-PCR             |
| q-GhROP3-R    | GGCCTCAAAGCTACTTTTATTG                |                     |
| GhUBQ7-F      | GAAGGCATTCCACCTGACCAAC                |                     |
| GhUBQ7-R      | CTTGACCTTCTTCTTCTTGTGCTTG             |                     |
| GhCLA1-F      | GCCCTTTGTGCATCTTC                     |                     |
| GhCLA1-R      | CTCTAGGGGCATTGAAG                     |                     |
| GhNCED2-F     | GACTCGCCGTGCCATTATTT                  |                     |
| GhNCED2-R     | CGACTTTGGCGAATCCTGAC                  |                     |
| GhNCED3-F     | TGGGTTGAATCCCCTGATACTT                |                     |
| GhNCED3-R     | GCGACGTGTGGACTTACCTGT                 |                     |
| GhNCED8-F     | TGCATGACACCACCAGATTCCA                |                     |
| GhNCED8-R     | TAATGGCACGGCGAGTCGATTT                |                     |
| GhNCED9-F     | CCCAGTAGACGGTCCGATAA                  |                     |
| GhNCED9-R     | ATCCCAAACCTTGACATCTTG                 |                     |
| GhZEP-F       | CTTCCCGCAAACAACATTTCG                 |                     |
| GhZEP-R       | GCCTTCCTCCTGCCATTATCA                 |                     |
| GhABI2-F      | AGTCAAATCCTCAAAGCCGAAAGTG             |                     |
| GhABI2-R      | ACAATAGTTCGCAACCTGACACCCT             |                     |
| GhABI5-F      | GTGGGTCCGAGTTTTGTTCC                  |                     |

|              |                          |
|--------------|--------------------------|
| GhABI5-R     | AGCTGCACCTACTTTTCCGT     |
| GhABF2-F     | CCAATTTGCTGGGAAGGATAA    |
| GhABF2-R     | GGTAACTGGTGCTGGTTTGATT   |
| GhABF4-F     | CCAGTCTTTCCAGAGCAGCA     |
| GhABF4-R     | TCCCATCCCACCACTCTGAA     |
| GhCYP707A-F  | TCTTTGAATCCCCCTTACACTTGA |
| GhCYP707A-R  | TGCCGCCATTGATGAACTGA     |
| GhARF6-F     | GATCCTTGGCCGGAGTTTGT     |
| GhARF6-R     | GGCTCGCATAGTCGTCACAA     |
| GhARF18-1-F  | CGTACCAAGGTACATATGCAAGG  |
| GhARF18-1-R  | ACAACCGTCCCTTCACACTCC    |
| GhARF18-5-F  | GGAACAAACGAACACAACGGTTG  |
| GhARF18-5-R  | CTTGCAAAAATCCATCCATGG    |
| GhYUC2-F     | ACCGATGTGGGTTTTGGCGAAT   |
| GhYUC2-R     | CTCAGCATTTTCCCCGGTAGCA   |
| GhYUC22-F    | ACAACGCATCCCTTCGACACAA   |
| GhYUC22-R    | ACAGACCGACGCAGTACAAACC   |
| GhCYP71A13-F | CGTAAACAGACCGAAACGCAGC   |
| GhCYP71A13-R | GTGGTTGCGGAAAAGAGTTCGC   |

---
